# Supplementary material for: Corynebacterium striatum—Got Worse by a Pandemic?
Source: MDPI journal article supplement (doi:10.3390/pathogens11060685), 2022-06-14
Supplement: s1 [file s1]

## **Pycaret-based prediction of resistance of C. straitum strains from 2022 until 2030:**

### **Ciprofloxacin:**

Model: Croston

$\alpha=0.02445940685773727$

### **Moxifloxacin:**

Model: NaiveForecaster

Seasonal periodicity=1

Strategy='last'

Window\_length=None

### **Clindamycin**

Model: Croston

$\alpha=0.02079310220576088$

### **Gentamicin:**

Model: AutoARIMA

D=None, alpha=0.05, d=None, error\_action='warn', information\_criterion='aic', D=1, d=2, max\_order=5, maxiter=50, method='lbfgs', n\_fits=10, n\_jobs=1, offset\_test\_args=None, out\_of\_sample\_size=0, random=False, scoring='mse', scoring\_args=None, seasonal=True, seasonal\_test='ocsb', seasonal\_test\_args=None, sp=1, P=1, Q=1, p=2, start\_params=None

### **Rifampicin:**

Model: BaseCdsDtForecaster

degree=1, deseasonal\_model='additive', regressor=HuberRegressor(alpha=0.0001, epsilon=1.35, fit\_intercept=True, max\_iter=100, tol=1e-05, warm\_start=False), sp=1, window\_length=1

### **Tetraciklin:**

Model: Croston

$\alpha=0.1$

### **Linezolid:**

Model:BaseCdsDtForecaster

degree=1, deseasonal\_model='additive', regressor=PassiveAggressiveRegressor(C=1.0, average=False, early\_stopping=False, epsilon=0.1, fit\_intercept=True, loss='epsilon\_insensitive', max\_iter=1000, n\_iter\_no\_change=5, random\_state=123, shuffle=True, tol=0.001, validation\_fraction=0.1, verbose=0, warm\_start=False), sp=1, window\_length=1)
